# Supplementary material for: Electrophoretic Deposition of Chitosan Films Doped with Nd2Ti2O7Nanoparticles as Protective Coatings against Corrosion in Saline Solutions
Source: Hindawi journal article supplement (doi:10.1155/2019/3864835), 2019-03-17
Supplement: f1 [file 3864835.f1.docx]

**Supplementary Material**

***Morphological Aspects of the Nd2Ti2O7 Nanoparticles***

| 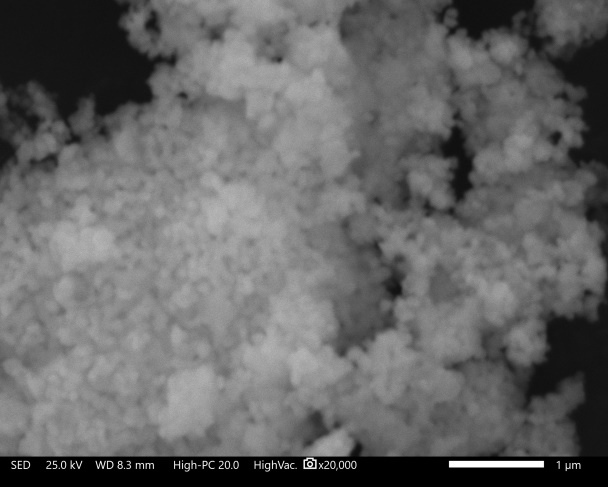 | 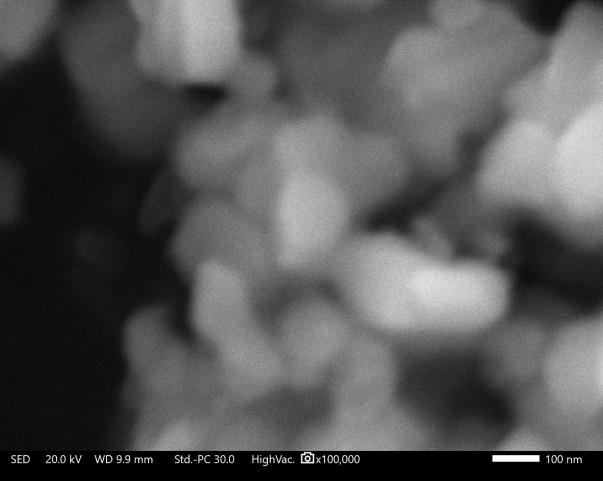 |
| --- | --- |

Figure S1. Morphological aspect of the Nd2Ti2O7 nanoparticles synthesized.

***Coating Deposition***


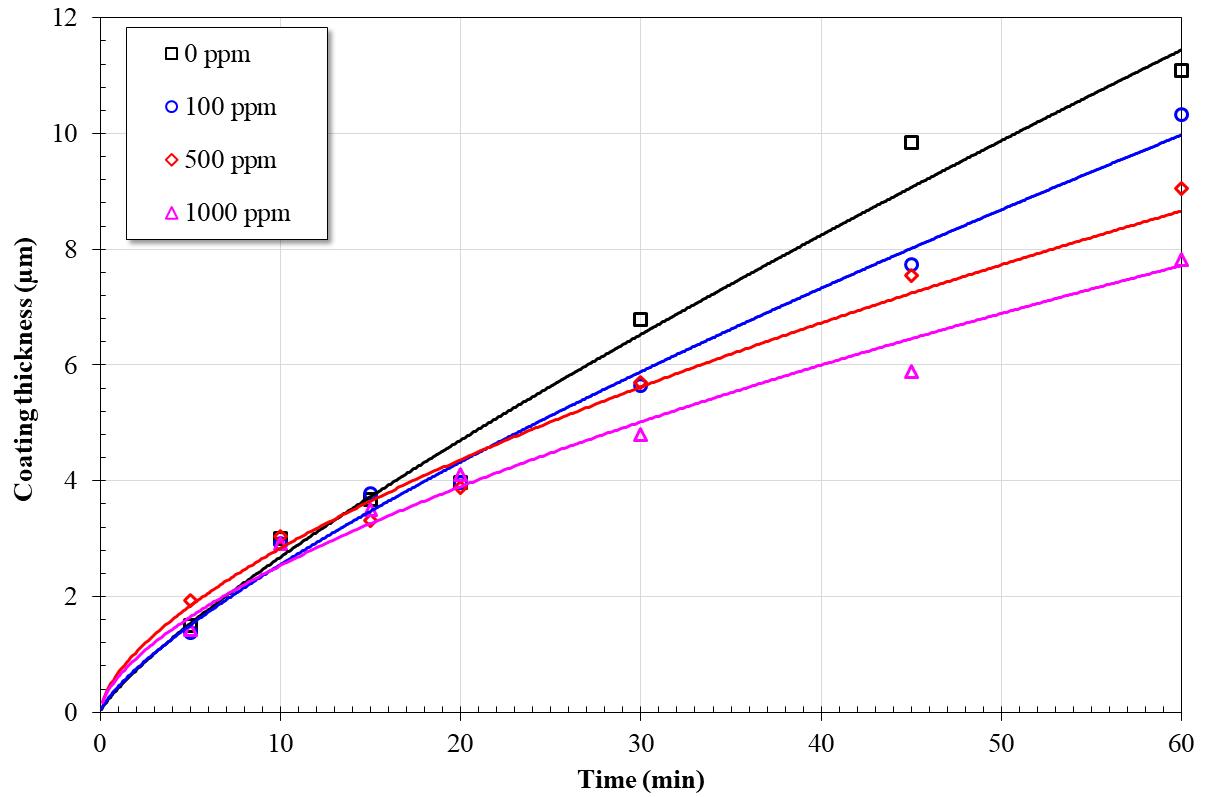


Figure S2. Effect of the nanoparticles concentration on the thickness of the chitosan films (Deposition voltage = 5 V).

| 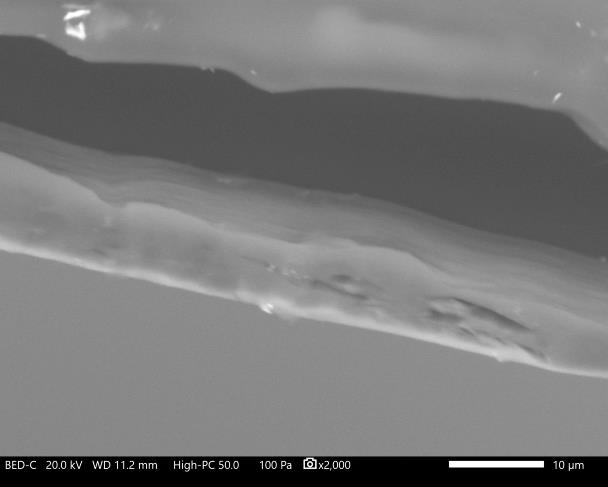  (0 ppm) | 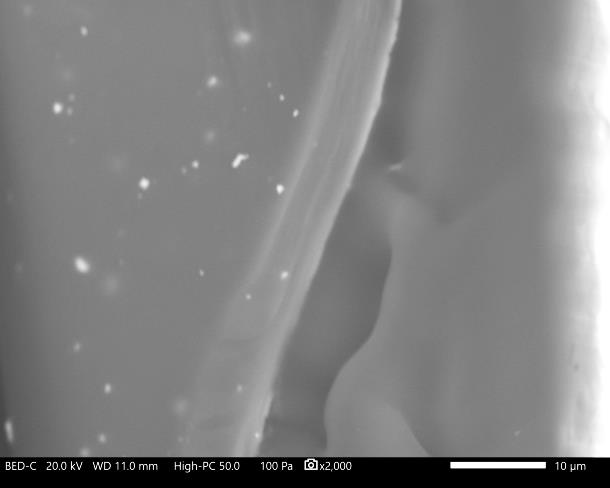  (100 ppm) |
| --- | --- |
| 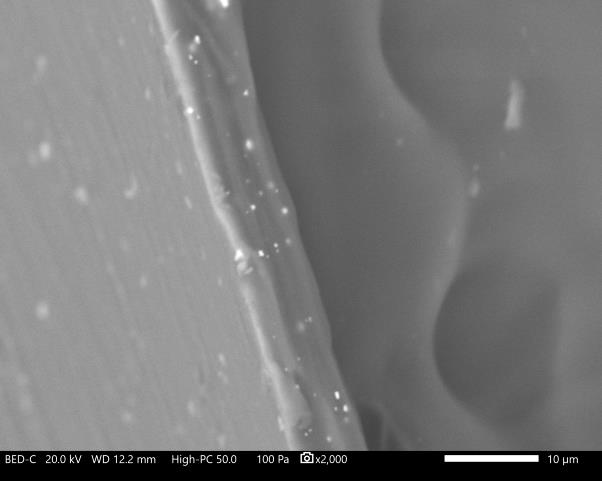  (500 ppm) | 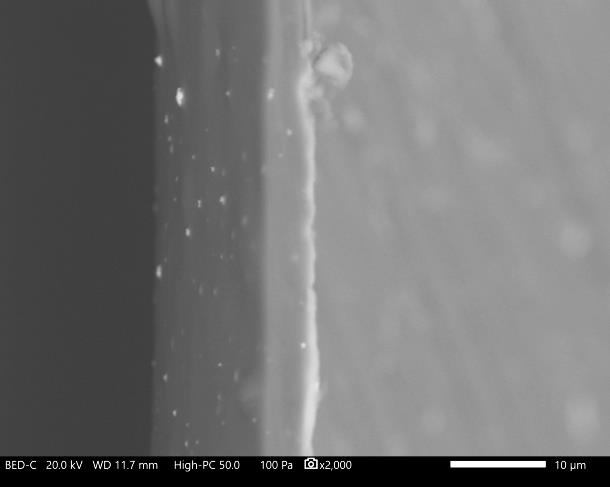  (1000 ppm) |

Figure S3. Appearance in cross section of the chitosan films according to the concentration of nanoparticles.

***EIS Measurements***

Figure S4 shows the evolution of the impedance spectra as a function of immersion time for 1018 carbon steel. The observations are similar to those previously indicated (figure 11). However, it is worth mentioning that the steel showed a slight increase in its charge transfer resistance as a function of the immersion time, but according to the evolution of its maximum phase angle, it both decreased and shifted towards lower frequencies. This may be due to the accumulation of non-protective corrosion products on the surface of the material.


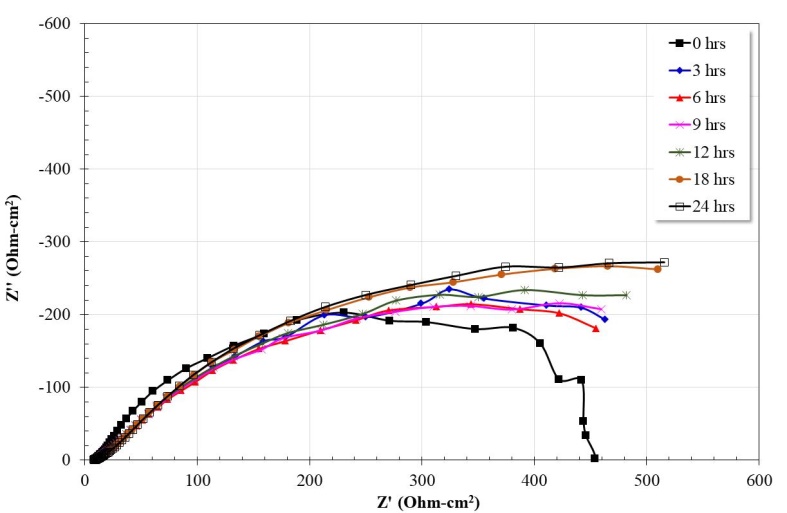


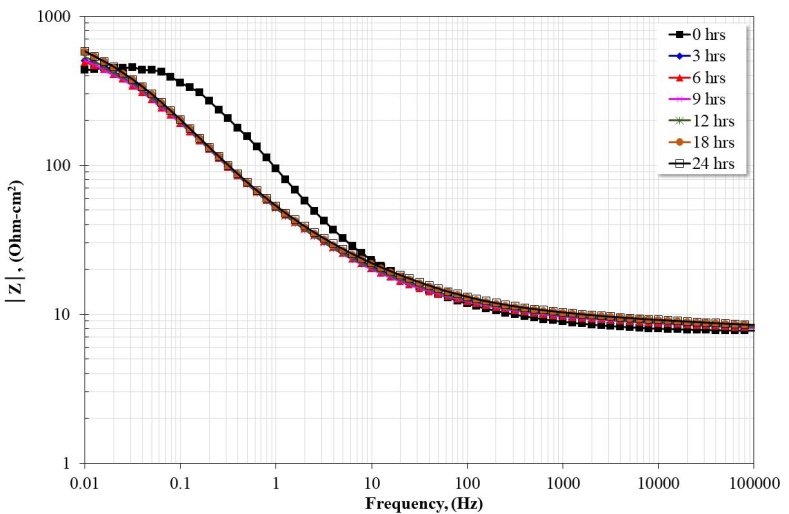


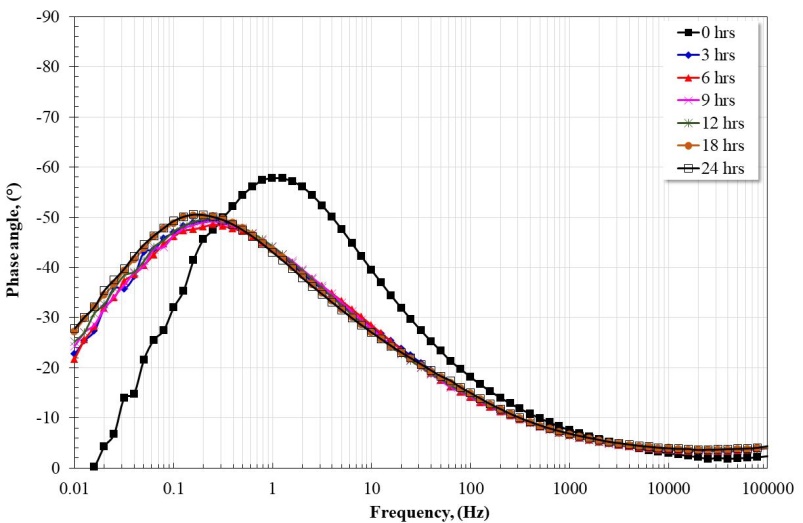


Figure S4. Nyquist and Bode diagrams for 1018 carbon steel evaluated in 3.5% NaCl solution.

Figure S5 shows the evolution of impedance spectra as a function of time for carbon steel coated with a chitosan film. The evolution of the Nyquist diagram shows an increase in the charge transfer resistance until 18 hours of immersion and subsequently it tends to decrease slightly. It is observed that at the beginning of the test, the capacitive semicircle presents an inductive process. This can be associated with the process of sorption and absorption of water that causes the swelling of the chitosan film. [40, 47, 52]. At longer times the water absorption process is no furthermore evident.


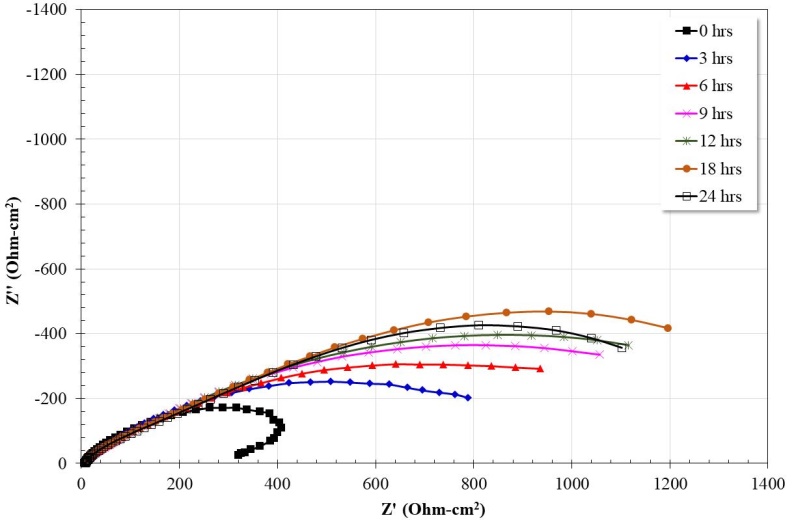


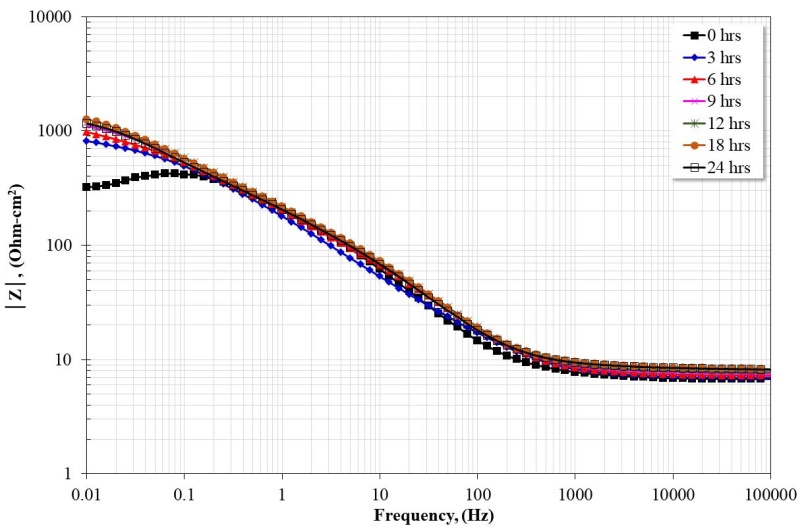


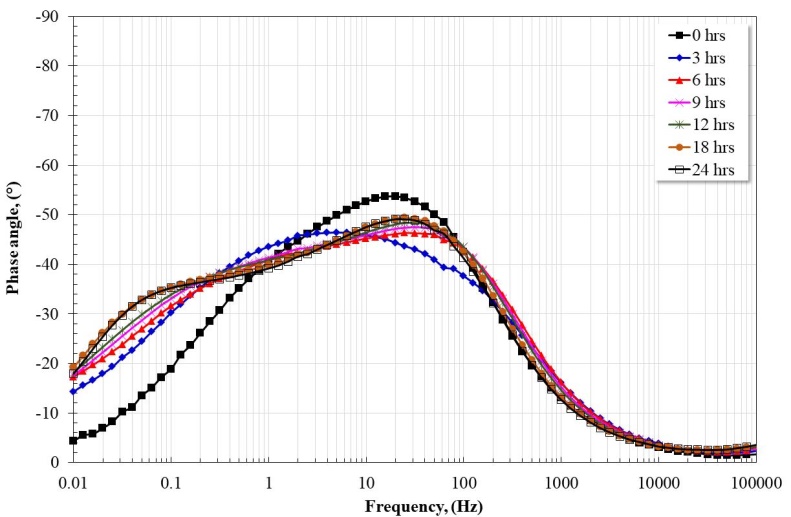


Figure S5. Nyquist and Bode diagrams for 1018 carbon steel coated with chitosan evaluated in 3.5% NaCl solution.

Figures S6 to S8 show the evolution of the impedance spectra as a function of time for carbon steel coated with a nanoparticles doped chitosan film. The evolution of the spectra is similar to that observed with the undoped chitosan film. The main difference observed is the increase in the diameter of the capacitive semicircle observed in the Nyquist diagram, and the increase in the impedance module in the low frequency region by increasing the nanoparticles concentration. This confirms that the nanoparticles co-deposition increased the charge transfer resistance of the carbon steel possibly due to a reduction in the effective area of mass transfer of the chitosan film which limited the diffusion of the aggressive species of the electrolyte.


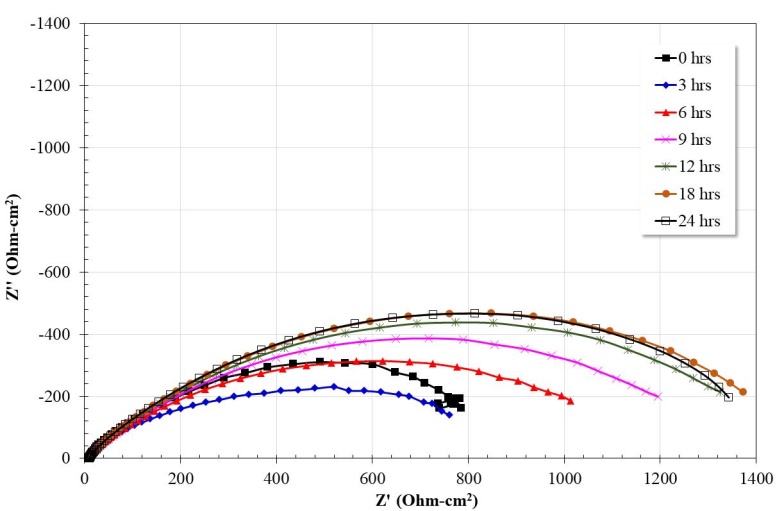


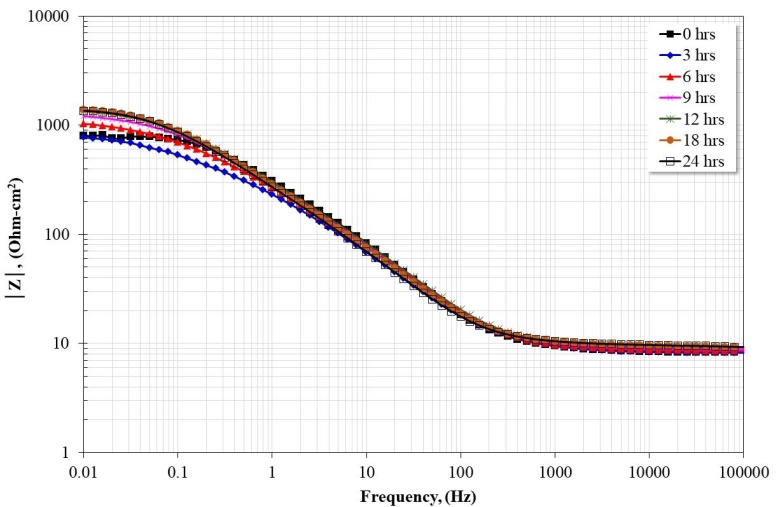


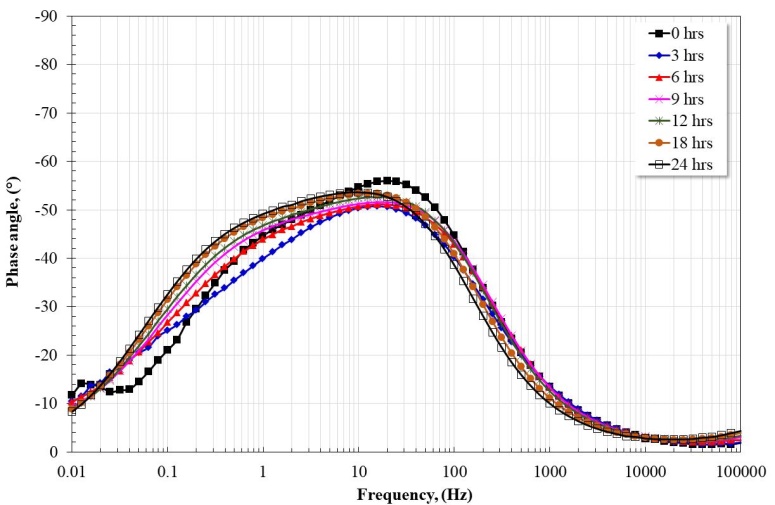


Figure S6. Nyquist and Bode diagrams for 1018 carbon steel coated with chitosan doped 100 ppm of nanoparticles in 3.5% NaCl solution.


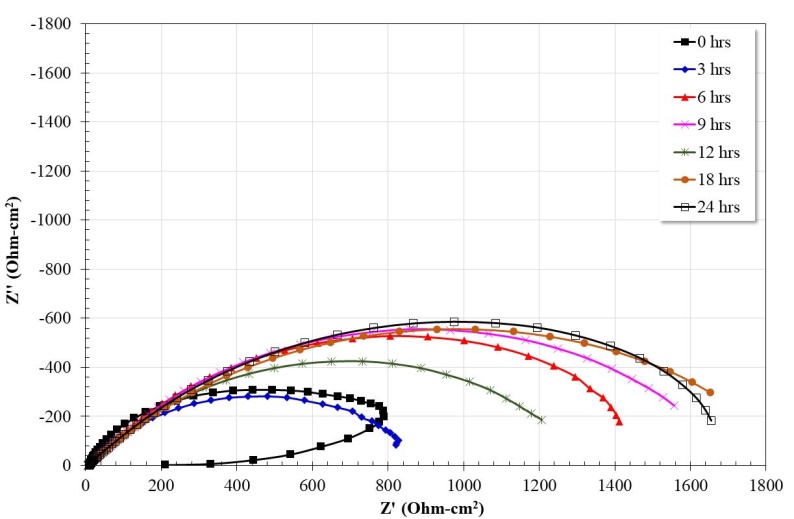


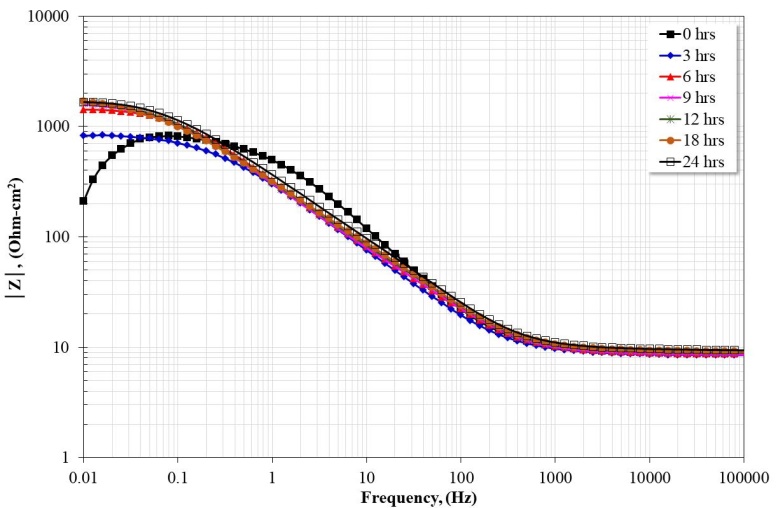


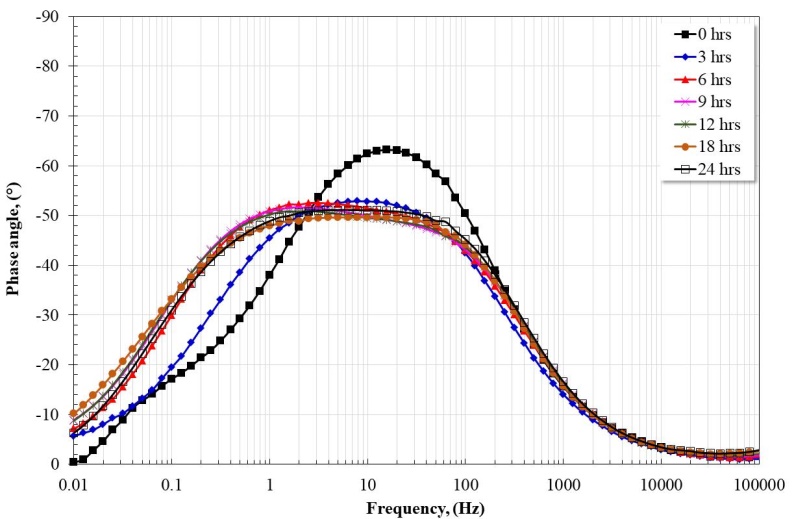


Figure S7. Nyquist and Bode diagrams for 1018 carbon steel coated with chitosan doped 500 ppm of nanoparticles in 3.5% NaCl solution.


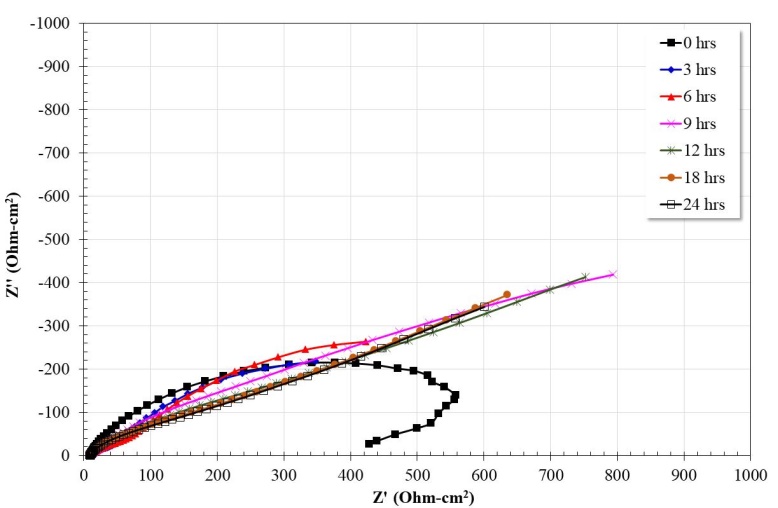


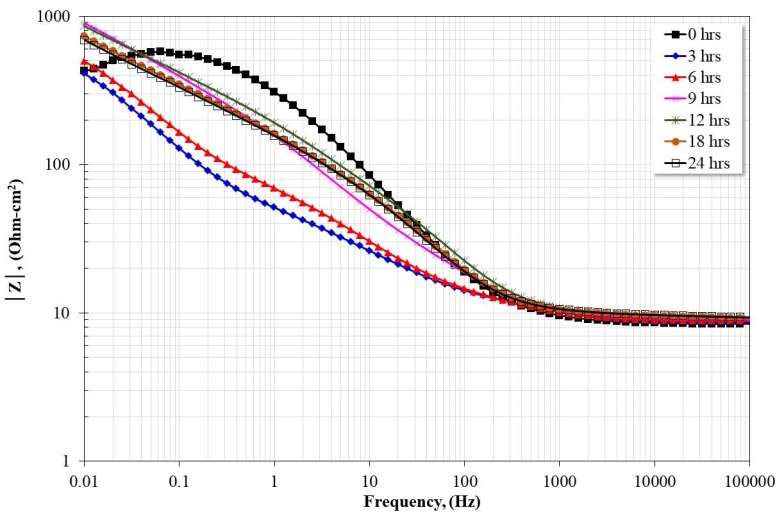


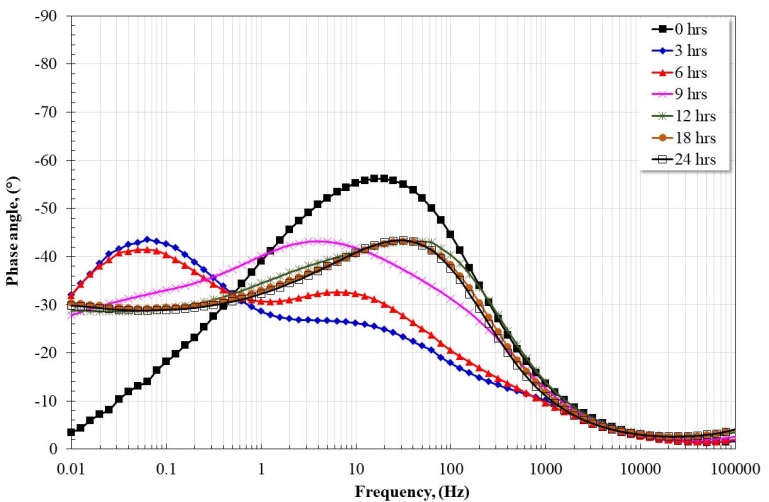


Figure S8. Nyquist and Bode diagrams for 1018 carbon steel coated with chitosan doped 1000 ppm of nanoparticles in 3.5% NaCl solution.
